# Supplementary material for: Assessment of atypical cells in detecting bladder cancer in female patients
Source: publisher site journal article supplement (doi:10.1515/cclm-2025-0268), 2025-06-17

| **Cut-off value (Atyp.C/µL)** | **Sensitivity (%)** | **Specificity (%)** | **PPV (%)** | **NPV (%)** |
| --- | --- | --- | --- | --- |
| primary BC n=65, with controls+ pyuria and bacteriuria (n=2940) |  |  |  |  |
| 2 | 63.1 | 53.5 | 2.9 | 98.5 |
| 4 | 38.5 | 81.1 | 4.3 | 98.3 |
| 6 | 29.2 | 90.1 | 6.1 | 98.3 |
| 8 | 20.0 | 93.7 | 6.5 | 98.1 |
| 10 | 15.4 | 95.7 | 7.2 | 98.1 |
| BC, bladder cancer; Atyp.C, atypical cell; PPV, positive predictive value; NPV, negative predictive value. | | | | |

Table S1. Diagnostic performance of Atyp.C in patients with primary BC versus controls.

Table S2. The correlation between log 10 (Atyp.C+1) and log 10 (other parameters +1) of urine particle counts results in primary BC and pyuria and bacteriuria groups.

| log 10 (parameters +1) | Primary BC | | pyuria and bacteriuria | |
| --- | --- | --- | --- | --- |
| r | P | r | P |
| RBC | 0.10 | 0.409 | 0.05 | 0.004# |
| WBC | 0.13 | 0.302 | 0.09 | ＜0.001* |
| EC | 0.23 | 0.065 | 0.02 | 0.296 |
| BACT | 0.32 | 0.010# | 0.09 | ＜0.001* |
| YLC | 0.23 | 0.061 | 0.06 | 0.002# |
| N.SEC | 0.24 | 0.051 | 0.02 | 0.373 |
| WBC clumps | 0.13 | 0.300 | 0.13 | ＜0.001* |
| SEC | 0.11 | 0.401 | 0.01 | 0.745 |

Particle concentrations were transformed to their natural logarithms because of the exponential ranges, by adding 1 to the counts before the transformation. Abbreviations: BC, bladder cancer; Atyp.C, Atypical cell; RBC, red blood cell; WBC, white blood cell; EC, epithelial cell; BACT, bacteria; YLC, yeast-like cell; N.SEC, non-squamous epithelial cell; SEC, squamous epithelial cell. # *P*＜0.05 and * *P*＜0.001, the parameters were statistically different in primary BC and pyuria and bacteriuria groups.

**Fig.S1 Predictive performance of Atyp.C for** **pyuria and bacteriuria in females (A)** Forest plot of univariate and multivariate logistic regression analysis for independent factors associated with female pyuria and bacteriuria. The green circles and green squares represent the OR of univariate and multivariate logistic regression, respectively; the two ends of the circles and square represent the 95% CI. If 95% CI crosses through the dotted line, it indicates that the corresponding variable is not correlated with pyuria and bacteriuria. **(B)** Diagnostic performance of Atyp.C alone, in combination with age, and with conductivity for detecting pyuria and bacteriuria. The AUC concentrations of the present study are provided in the lower right corner. Abbreviations: OR, odds ratio; CI, confidence interval; ROC, receiver operating characteristic; AUC, area under the curve. Cond.: conductivity.


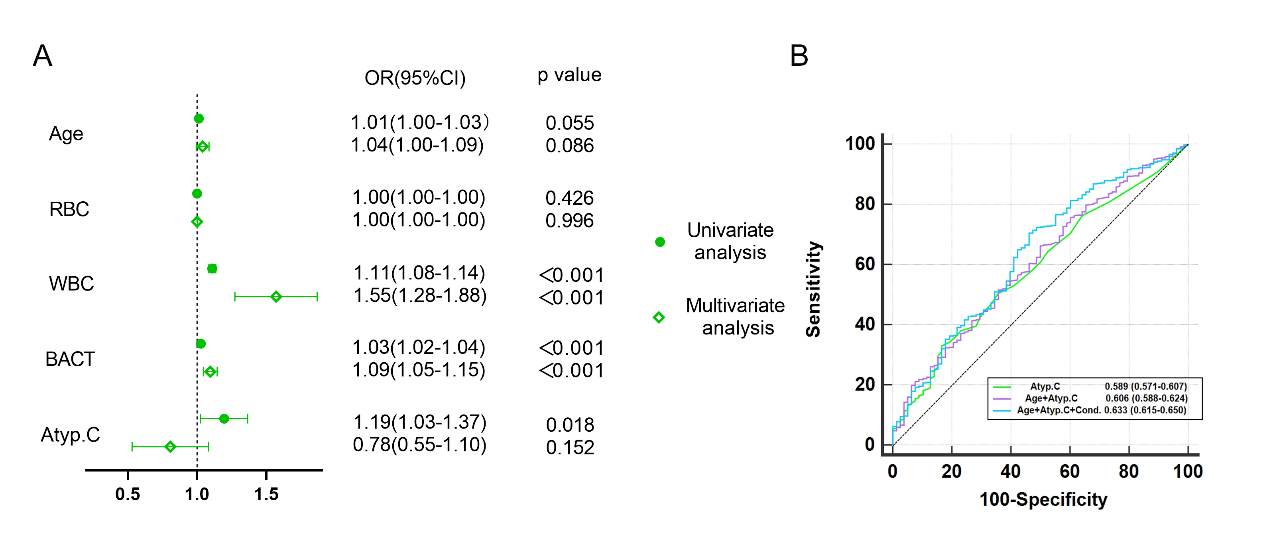

Supplement: Supplementary file 1 [file j_cclm-2025-0268_suppl_001.docx]
